# Supplementary material for: Pipes to Earth's subsurface: The role of atmospheric conditions in controlling air transport through boreholesand shafts
Source: Copernicus journal article supplement (doi:10.5194/esd-2018-18), 2018-04-25
Supplement: Supplementary file 1 [file esd-2018-18-supplement.pdf]

Supporting information for

**Pipes to Earth's subsurface: The role of atmospheric conditions in controlling air transport through boreholes and shafts**

Elad Levintal<sup>1</sup>, Nadav G Lensky<sup>2</sup>, Amit Mushkin<sup>3</sup>, Noam Weisbrod<sup>1</sup>

<sup>1</sup>Environmental Hydrology and Microbiology, The Zuckerberg Institute for Water Research, The Jacob Blaustein Institutes for Desert Research, Ben-Gurion University of the Negev, Midreshet Ben-Gurion 8499000, Israel.

10 <sup>2</sup>Geological Survey of Israel, Jerusalem 9550161, Israel.

<sup>3</sup>Department of Earth & Space Sciences, University of Washington, Seattle WA 98105, USA.

*Corresponding author:* Noam Weisbrod (weisbrod@bgu.ac.il)

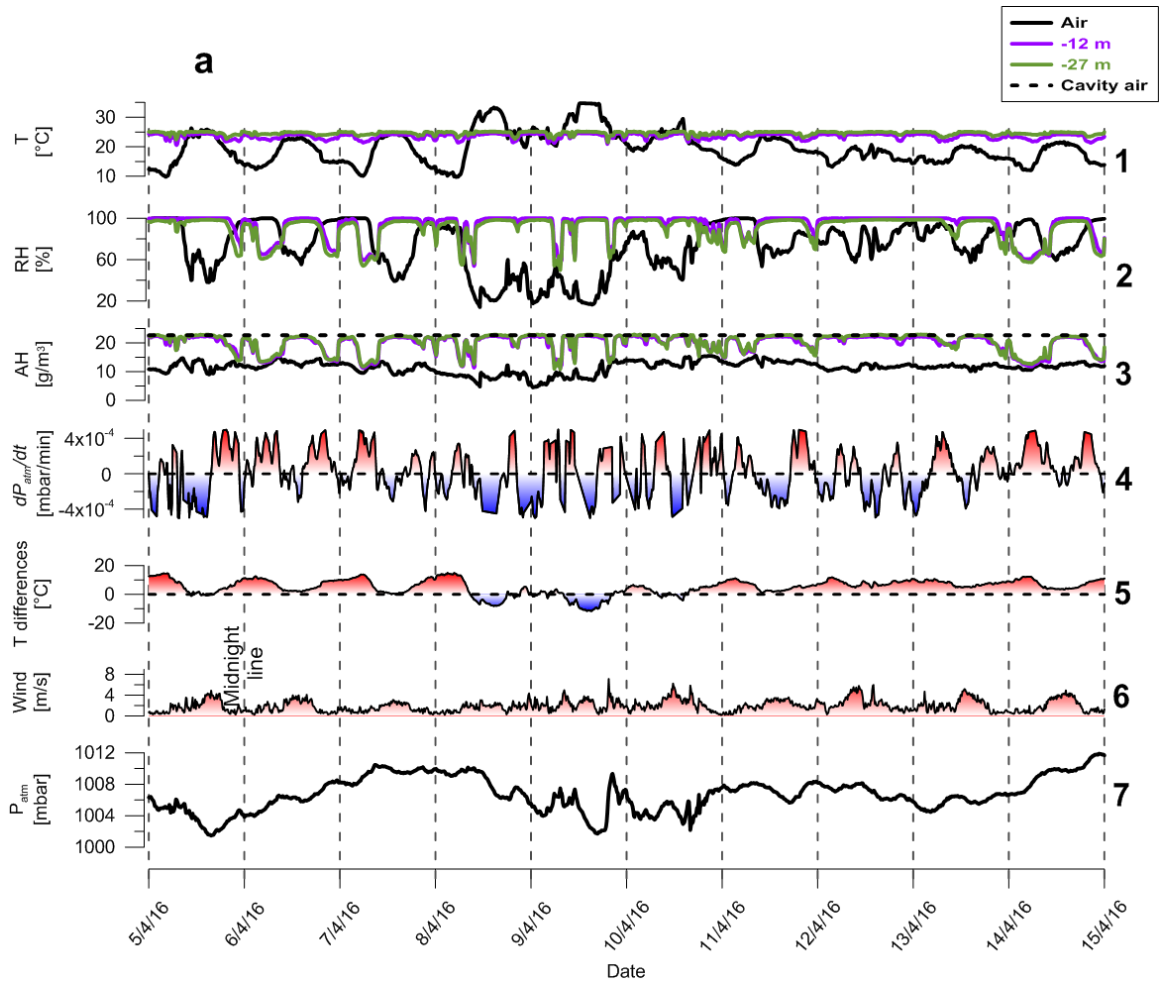

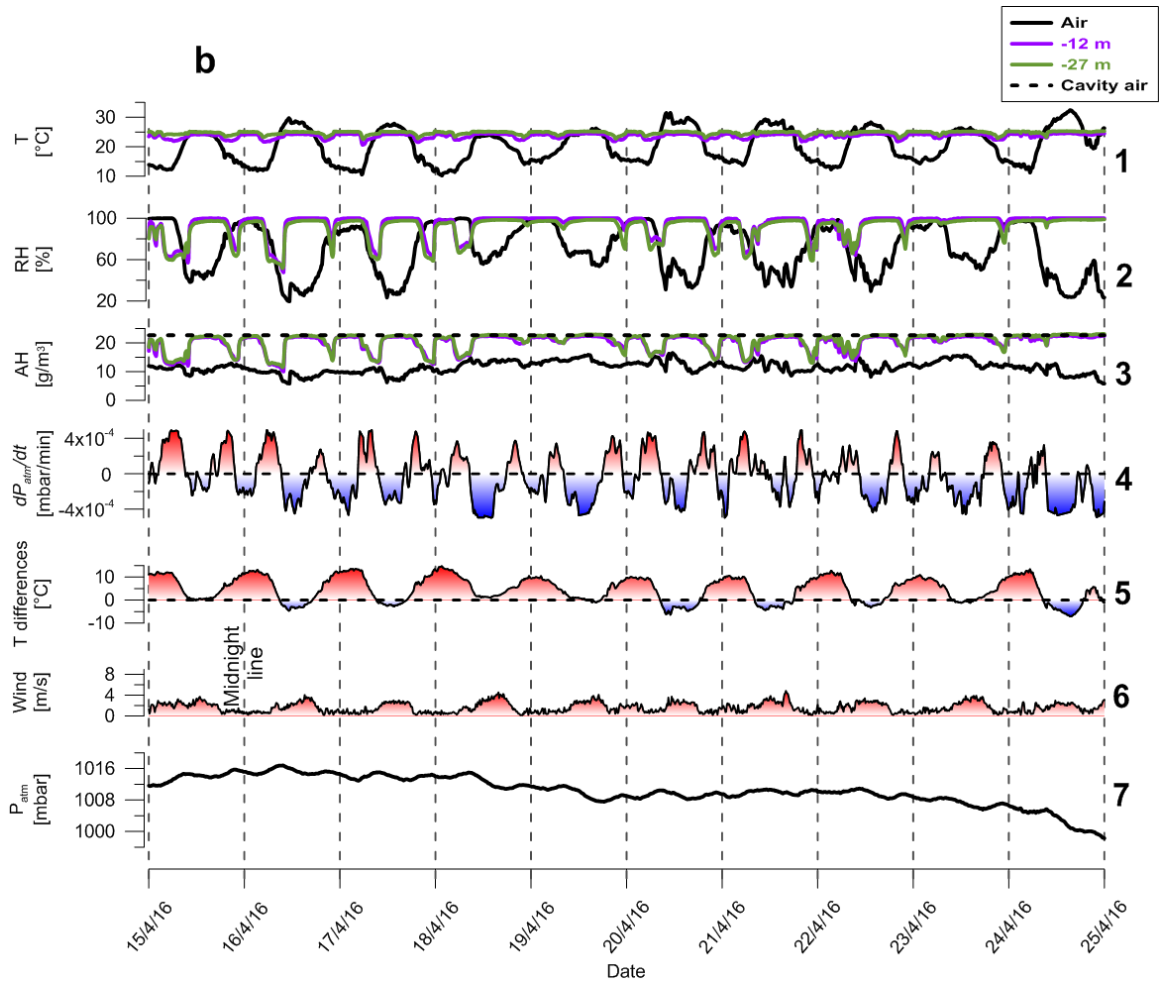

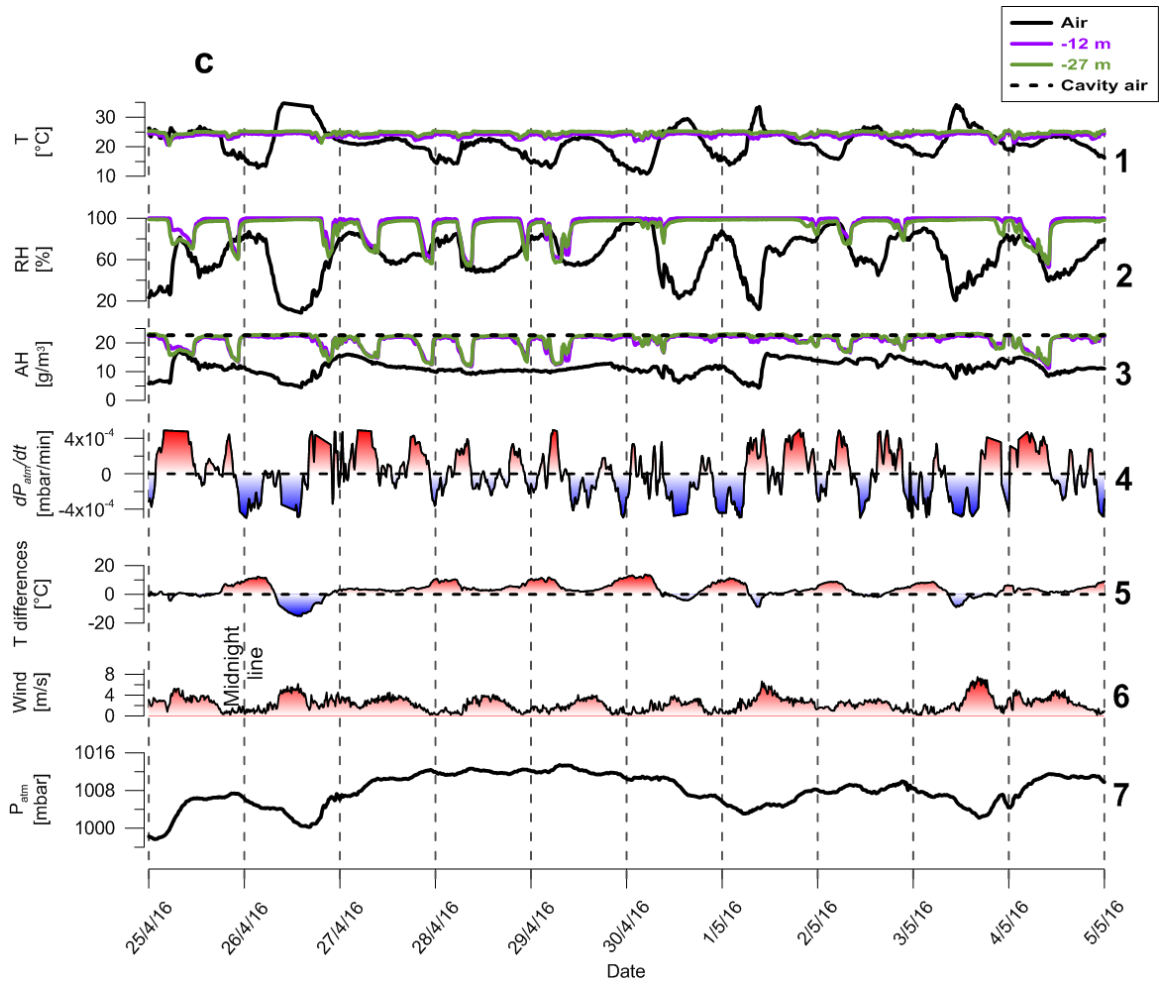

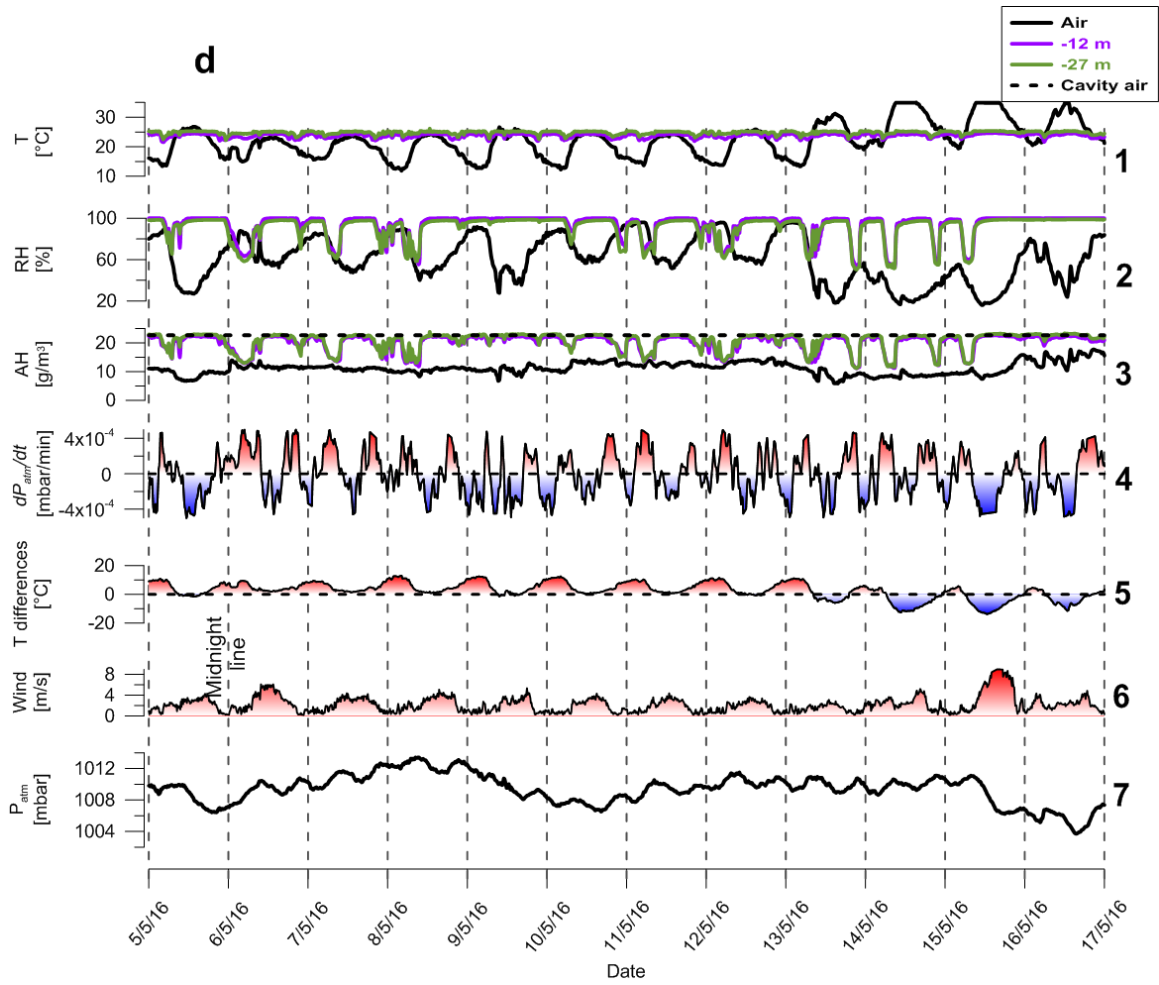

Figure. S1. Time series results from the full 42-day *shaft* observations. Absolute humidity (AH) values were calculated using Eq. (1). The lower boundary (black dashed line in 3) was approximated as constant with  $T = 24.7$  °C and  $RH = 100$  %. T differences values (5) represent the temperature differences between the sensor at 12 m depth and the sensor above ground.

5
